# Supplementary material
Source: publisher site journal article supplement (https://static.cambridge.org/content/id/urn:cambridge.org:id:article:S004317452000003X/resource/name/S004317452000003Xsupp001.xlsx)
Supplement: Supplementary file 1 [file S004317452000003Xsupp001.xlsx]

## Sheet: Sheet1
	Forward Primer	Reverse Primer	Repeat Type	Used for Diversity Analysis
SG-SSR1	GCTCTCTTCTGCTGTGATGAAA	TGTATCGGCTCGTGTATTATCG	(AG)15	No
SG-SSR2	TTCGGGTTCAATCATCCAAT	CGCAGTTTACATCATATTCTGGC	(AT)19	No
SG-SSR3	GCTGTAAATGATGCAAGGAGAA	CCTCTGAACACTATCTGTTTATGGA	(TA)19	Yes
SG-SSR4	GGTAGAAGCATGTCCCAACATT	CACATAAAACTCTAACCTTGATCCG	(AT)6	No
SG-SSR5	GGTCCACGAGTTCGGTTTAT	TTGTTATGTCCCAAGAGGTGAA	(TA)16(AT)19	No
SG-SSR6	GCCAGTCATGTGGGTAAGTTTT	GGGTTGTTGTCGCTTATTTCTC	(AG)18	Yes
SG-SSR7	GTACAAAGATCGGGTTGGTTTT	GAAATGCGAGGACGGAAT	(TA)13	No
SG-SSR8	GCCTGGTCAACAACTCCTATTC	TTATACGCTCACTCGATGGAAG	(TAC)6	Yes
SG-SSR9	AGAATAAAGGCAATCGACAAGG	TCGAACAATTACCCTCTCACG	(AG)22	No
SG-SSR10	TAGGGACAAAGTCGTCAAACAA	GGAGGGAGTACAATCACAGAGAC	(AAT)6	Yes
SG-SSR11	ACTGCCCCTTCTTTAGGTTTTC	GGAGAAATGGAGCTATTCATGC	(CT)36	Yes
SG-SSR12	TCATCCTACTTGTCACCAAACG	CGCGCTTCTCGTTCTCTAAAT	(TAT)16	Yes
SG-SSR13	ACATTGCCTCCTTTTGTCACTT	AAGCTGTTCGTTCCACTCAAAT	(CT)29	Yes
SG-SSR14	GAATAGGATGGGTGTGATGGTC	TAGCCTTGTTCGAGAGTTACCG	(GAA)6	No
SG-SSR15	AAGAGAAAAGAGGAAACTGGGC	AGAAACGTGAGTTGTCAGTCCC	(AT)14	No
SG-SSR16	CCACCTTCTCATTTCCTACGAG	GGTGCCTGTTCTCTAGCATTTC	(AG)8(AG)20	Yes
SG-SSR17	CGTATAACACCTTTGTGCAATC	GCGAAATGAATCGGAATATG	(TA)13	No
SG-SSR18	GATAAGATCGGCAGAGGATGAC	AGGCTCCTAAAACCAATGCTAA	(TAT)17	Yes
SG-SSR19	CATAAAATTCACGAGGATCACG	GAAGATGAGTCTGAAAATGGGC	(AAG)13	Yes
SG-SSR20	TGAAACGGGGATATAAACGATG	TGCTACACATTCCAATCTCACC	(AAT)17	Yes
